# Supplementary material for: Antimicrobial Resistance in Physiological and Potentially Pathogenic Bacteria Isolated in Southern Italian Bats
Source: MDPI journal article supplement (doi:10.3390/ani13060966), 2023-03-07
Supplement: s1 [file s1]

Supplementary Table S1: Gram negative strains for different samples

| Bacterial Family         | Bacterial species                        | Number of strains |   |    |       |
|--------------------------|------------------------------------------|-------------------|---|----|-------|
|                          |                                          | R                 | C | O  | Total |
| Aeromonadaceae           | <i>Aeromonas hydrophila</i>              |                   |   | 3  | 3     |
|                          | <i>Aeromonas</i> spp                     |                   |   | 1  | 1     |
| Alcaligenaceae           | <i>Achromobacter denitrificans</i>       |                   | 1 |    | 1     |
|                          | <i>Achromobacter insolitus</i>           |                   | 1 | 1  | 2     |
|                          | <i>Alcaligenes faecalis</i>              |                   | 1 |    | 1     |
|                          | <i>Alcaligenes xylosoxidans</i>          |                   |   | 1  | 1     |
| Enterobacteriaceae Group | <i>Citrobacter amalonaticus</i>          | 3                 |   | 2  | 5     |
|                          | <i>Citrobacter farmeri</i>               | 1                 |   | 1  | 2     |
|                          | <i>Citrobacter freundii</i>              | 16                |   | 5  | 21    |
|                          | <i>Citrobacter sedlakii</i>              | 2                 |   |    | 2     |
|                          | <i>Citrobacter</i> spp                   | 31                | 3 | 12 | 46    |
|                          | <i>Citrobacter youngae</i>               | 1                 |   |    | 1     |
|                          | <i>Cronobacter muytjensis</i>            |                   | 1 |    | 1     |
|                          | <i>Cronobacter zurichensis</i>           |                   |   | 1  | 1     |
|                          | <i>Enterobacter aerogenes</i>            | 2                 | 1 | 9  | 12    |
|                          | <i>Enterobacter agglomerans</i>          | 2                 |   |    | 2     |
|                          | <i>Enterobacter asburiae</i>             |                   |   | 1  | 1     |
|                          | <i>Enterobacter cancerogenus</i>         | 11                | 2 | 6  | 19    |
|                          | <i>Enterobacter cloacae</i>              | 38                | 5 | 28 | 71    |
|                          | <i>Enterobacter gergoviae</i>            |                   |   | 1  | 1     |
|                          | <i>Enterobacter kobei</i>                | 4                 | 1 | 5  | 10    |
|                          | <i>Enterobacter ludwigii</i>             | 7                 | 1 | 4  | 12    |
|                          | <i>Enterobacter</i> spp                  | 6                 | 1 | 4  | 11    |
|                          | <i>Escherichia coli</i>                  | 6                 | 1 | 6  | 13    |
|                          | <i>Hafnia alvei</i>                      | 19                | 4 | 24 | 47    |
|                          | <i>Klebsiella oxytoca</i>                | 3                 |   | 10 | 13    |
|                          | <i>Klebsiella pneumoniae</i>             | 2                 | 1 | 2  | 5     |
|                          | <i>Kluyvera intermedia</i>               |                   |   | 2  | 2     |
|                          | <i>Leclercia adecarboxilata</i>          |                   |   | 1  | 1     |
|                          | <i>Moellerella wisconsensis</i>          |                   |   | 2  | 2     |
|                          | <i>Morganella morganii</i>               | 2                 | 1 | 13 | 16    |
|                          | <i>Pantoea agglomerans</i>               |                   | 1 |    | 1     |
|                          | <i>Proteus mirabilis</i>                 | 1                 |   | 4  | 5     |
|                          | <i>Proteus vulgaris</i>                  | 1                 | 1 |    | 2     |
|                          | <i>Providencia alcalifaciens</i>         |                   |   | 2  | 2     |
|                          | <i>Providencia rettgeri</i>              | 8                 | 2 | 7  | 17    |
|                          | <i>Providencia rustigianii</i>           | 1                 | 1 | 1  | 3     |
|                          | <i>Providencia</i> spp                   |                   |   | 1  | 1     |
|                          | <i>Rahnella aquatilis</i>                |                   |   | 1  | 1     |
|                          | <i>Salmonella</i> Manhattan <sup>a</sup> | 1                 |   |    | 1     |
|                          | <i>Serratia liquefaciens</i>             | 1                 |   | 3  | 4     |
|                          | <i>Serratia marcescens</i>               | 2                 |   | 19 | 21    |
|                          | <i>Serratia plymuthica</i>               | 1                 |   |    | 1     |
|                          | <i>Shigella flexneri</i>                 |                   | 1 |    | 1     |
| Moraxellaceae            | <i>Acinetobacter</i> spp.                |                   | 1 |    | 1     |
| Pasteurellaceae          | <i>Pasteurella aerogenes</i>             | 1                 |   |    | 1     |

|                  |                                 |     |    |     |
|------------------|---------------------------------|-----|----|-----|
| Pseudomonadaceae | <i>Pseudomonas aeruginosa</i>   | 2   | 11 | 13  |
|                  | <i>Pseudomonas aureofaciens</i> |     | 1  | 1   |
|                  | <i>Pseudomonas</i> spp          | 1   |    | 1   |
|                  | <i>Pseudomonas stutzeri</i>     | 2   | 2  | 4   |
|                  | <i>Not id</i>                   | 1   | 1  | 4   |
| Total            |                                 | 178 | 36 | 199 |
|                  |                                 |     |    | 413 |

<sup>a</sup>Salmonella isolate named by the respective serotype of *Salmonella enterica* ssp. *enterica*.

Supplementary Table S2: Gram negative strains for species of bat

|                          |                                        | Number of isolates                  |                              |                          |                                     |       |
|--------------------------|----------------------------------------|-------------------------------------|------------------------------|--------------------------|-------------------------------------|-------|
| Bacterial Family         | Bacterial species                      | <i>Miniopterus<br/>schreibersii</i> | <i>Myotis<br/>capaccinii</i> | <i>Myotis<br/>myotis</i> | <i>Rhinolophus<br/>hipposideros</i> | Total |
| Aeromonadaceae           | <i>Aeromonas hydrophila</i>            | 1                                   |                              |                          | 2                                   | 3     |
|                          | <i>Aeromonas</i> spp                   |                                     | 1                            |                          |                                     | 1     |
| Alcaligenaceae           | <i>Achromobacter<br/>denitrificans</i> |                                     |                              |                          | 1                                   | 1     |
|                          | <i>Achromobacter insolitus</i>         | 1                                   |                              |                          | 1                                   | 2     |
|                          | <i>Alcaligenes faecalis</i>            | 1                                   |                              |                          |                                     | 1     |
|                          | <i>Alcaligenes xylosoxidans</i>        |                                     |                              |                          | 1                                   | 1     |
| Enterobacteriaceae Group | <i>Citrobacter amalonaticus</i>        | 1                                   |                              | 4                        |                                     | 5     |
|                          | <i>Citrobacter farmeri</i>             | 2                                   |                              |                          |                                     | 2     |
|                          | <i>Citrobacter freundii</i>            | 8                                   | 2                            | 3                        | 8                                   | 21    |
|                          | <i>Citrobacter sedlakii</i>            |                                     |                              | 2                        |                                     | 2     |
|                          | <i>Citrobacter</i> spp                 | 19                                  |                              | 17                       | 10                                  | 46    |
|                          | <i>Citrobacter youngae</i>             | 1                                   |                              |                          |                                     | 1     |
|                          | <i>Cronobacter muytjensis</i>          |                                     |                              | 1                        |                                     | 1     |
|                          | <i>Cronobacter zurichensis</i>         |                                     |                              | 1                        |                                     | 1     |
|                          | <i>Enterobacter aerogenes</i>          | 2                                   |                              | 9                        | 1                                   | 12    |
|                          | <i>Enterobacter agglomerans</i>        | 2                                   |                              |                          |                                     | 2     |
|                          | <i>Enterobacter asburiae</i>           |                                     |                              |                          | 1                                   | 1     |
|                          | <i>Enterobacter cancerogenus</i>       | 9                                   |                              | 5                        | 5                                   | 19    |
|                          | <i>Enterobacter cloacae</i>            | 42                                  |                              | 20                       | 9                                   | 71    |
|                          | <i>Enterobacter gergoviae</i>          |                                     |                              |                          | 1                                   | 1     |
|                          | <i>Enterobacter kobei</i>              | 6                                   |                              | 2                        | 2                                   | 10    |
|                          | <i>Enterobacter ludwigii</i>           | 6                                   |                              | 4                        | 2                                   | 12    |
|                          | <i>Enterobacter</i> spp                | 8                                   |                              | 2                        | 1                                   | 11    |
|                          | <i>Escherichia coli</i>                | 4                                   |                              | 2                        | 7                                   | 13    |
|                          | <i>Hafnia alvei</i>                    | 21                                  | 2                            | 6                        | 18                                  | 47    |
|                          | <i>Klebsiella oxytoca</i>              | 2                                   | 2                            | 2                        | 7                                   | 13    |
|                          | <i>Klebsiella pneumoniae</i>           | 1                                   |                              | 4                        |                                     | 5     |
|                          | <i>Kluyvera intermedia</i>             | 1                                   |                              | 1                        |                                     | 2     |
|                          | <i>Leclercia adecarboxilata</i>        |                                     |                              | 1                        |                                     | 1     |
|                          | <i>Moellerella wisconsensis</i>        |                                     |                              |                          | 2                                   | 2     |
|                          | <i>Morganella morganii</i>             | 8                                   | 1                            | 1                        | 6                                   | 16    |
|                          | <i>Pantoea agglomerans</i>             | 1                                   |                              |                          |                                     | 1     |
|                          | <i>Proteus mirabilis</i>               | 2                                   |                              | 1                        | 2                                   | 5     |
|                          | <i>Proteus vulgaris</i>                | 1                                   |                              |                          | 1                                   | 2     |

|                  |                                  |        |      |        |        |
|------------------|----------------------------------|--------|------|--------|--------|
|                  | <i>Providencia alcalifaciens</i> | 1      |      | 1      | 2      |
|                  | <i>Providencia rettgeri</i>      |        | 1    | 8      | 17     |
|                  | <i>Providencia rustigianii</i>   | 3      |      |        | 3      |
|                  | <i>Providencia spp</i>           |        |      | 1      | 1      |
|                  | <i>Rahnella aquatilis</i>        | 1      |      |        | 1      |
|                  | <i>Salmonella enterica</i>       |        |      | 1      | 1      |
|                  | <i>Serratia liquefaciens</i>     | 1      | 1    | 1      | 4      |
|                  | <i>Serratia marcescens</i>       | 7      | 4    | 3      | 21     |
|                  | <i>Serratia plymuthica</i>       |        |      | 1      | 1      |
|                  | <i>Shigella flexneri</i>         |        |      | 1      | 1      |
| Moraxellaceae    | <i>Acinetobacter spp.</i>        | 1      |      |        | 1      |
| Pasteurellaceae  | <i>Pasteurella aerogenes</i>     |        |      | 1      | 1      |
| Pseudomonadaceae | <i>Pseudomonas aeruginosa</i>    | 3      |      | 10     | 13     |
|                  | <i>Pseudomonas aureofaciens</i>  | 1      |      |        | 1      |
|                  | <i>Pseudomonas spp</i>           | 1      |      |        | 1      |
|                  | <i>Pseudomonas stutzeri</i>      | 2      |      | 2      | 4      |
|                  | Not id.                          | 4      | 1    | 1      | 6      |
|                  | Total                            | 175/91 | 15/8 | 112/47 | 111/43 |
|                  |                                  |        |      |        | 413    |

Supplementary Table S3: Gram positive strains for different samples.

| Bacterial Family  | Bacterial species                 | Number of isolates |    |       |
|-------------------|-----------------------------------|--------------------|----|-------|
|                   |                                   | C                  | O  | Total |
| Aerococcaceae     | <i>Aerococcus viridans</i>        | 1                  | 2  | 3     |
| Bacillaceae       | <i>Bacillus amiloliquefaciens</i> | 3                  | 1  | 4     |
|                   | <i>Bacillus atrophaeus</i>        | 1                  |    | 1     |
|                   | <i>Bacillus brevis</i>            | 1                  | 1  | 2     |
|                   | <i>Bacillus cereus</i>            | 2                  | 3  | 5     |
|                   | <i>Bacillus circulans</i>         |                    | 2  | 2     |
|                   | <i>Bacillus clausii</i>           | 2                  |    | 2     |
|                   | <i>Bacillus coagulans</i>         | 1                  |    | 1     |
|                   | <i>Bacillus fastidiosus</i>       | 1                  |    | 1     |
|                   | <i>Bacillus firmus</i>            | 1                  |    | 1     |
|                   | <i>Bacillus laterosporus</i>      | 1                  |    | 1     |
|                   | <i>Bacillus licheniformis</i>     | 4                  | 11 | 15    |
|                   | <i>Bacillus macerans</i>          | 1                  |    | 1     |
|                   | <i>Bacillus megaterium</i>        | 11                 | 3  | 14    |
|                   | <i>Bacillus pantothenicus</i>     | 1                  |    | 1     |
|                   | <i>Bacillus pasteurii</i>         | 1                  |    | 1     |
|                   | <i>Bacillus pumilis</i>           | 3                  | 2  | 5     |
|                   | <i>Bacillus simplex</i>           | 2                  |    | 2     |
|                   | <i>Bacillus sphaericus</i>        | 2                  |    | 2     |
|                   | <i>Bacillus spp</i>               | 2                  |    | 2     |
|                   | <i>Bacillus subtilis</i>          | 6                  | 2  | 8     |
| Enterococcaceae   | <i>Enterococcus casseliflavus</i> | 2                  | 1  | 3     |
|                   | <i>Enterococcus faecalis</i>      | 9                  | 19 | 28    |
| Lactobacillaceae  | <i>Alloicoccus otitis</i>         |                    | 1  | 1     |
| Paenibacillaceae  | <i>Paenibacillus durus</i>        |                    | 1  | 1     |
| Staphylococcaceae | <i>Staphylococcus aureus</i>      |                    | 1  | 1     |

|       |                                       |     |    |     |
|-------|---------------------------------------|-----|----|-----|
|       | <i>Staphylococcus capitis</i>         | 2   | 1  | 3   |
|       | <i>Staphylococcus cohnii</i> subsp. 1 | 2   | 2  | 4   |
|       | <i>Staphylococcus cohnii</i> subsp. 2 | 5   |    | 5   |
|       | <i>Staphylococcus epidermidis</i>     | 9   |    | 9   |
|       | <i>Staphylococcus gallinarum</i>      | 1   | 1  | 2   |
|       | <i>Staphylococcus haemolyticus</i>    | 2   | 2  | 4   |
|       | <i>Staphylococcus hominis</i>         | 1   |    | 1   |
|       | <i>Staphylococcus koosi</i>           |     | 3  | 3   |
|       | <i>Staphylococcus lentus</i>          | 2   | 5  | 7   |
|       | <i>Staphylococcus saprophyticus</i>   | 2   | 1  | 3   |
|       | <i>Staphylococcus sciuri</i>          | 1   | 11 | 12  |
|       | <i>Staphylococcus simulans</i>        | 2   |    | 2   |
|       | <i>Staphylococcus warneri</i>         | 8   | 2  | 10  |
|       | <i>Staphylococcus xylosus</i>         | 5   | 2  | 7   |
|       | Not id.                               | 1   | 1  | 2   |
| Total |                                       | 101 | 81 | 183 |

Supplementary Table S4: Gram positive strains for species of bat

| Bacterial Family  | Bacterial species                     | Number of isolates              |                          |                      |                                 | Total |
|-------------------|---------------------------------------|---------------------------------|--------------------------|----------------------|---------------------------------|-------|
|                   |                                       | <i>Miniopterus schreibersii</i> | <i>Myotis capaccinii</i> | <i>Myotis myotis</i> | <i>Rhinolophus hipposideros</i> |       |
| Aerococcaceae     | <i>Aerococcus viridans</i>            | 2                               | 1                        |                      |                                 | 3     |
|                   | <i>Bacillus amyloliquefaciens</i>     | 2                               |                          | 2                    |                                 | 4     |
|                   | <i>Bacillus atrophaeus</i>            |                                 |                          | 1                    |                                 | 1     |
|                   | <i>Bacillus brevis</i>                | 1                               |                          |                      | 1                               | 2     |
|                   | <i>Bacillus cereus</i>                | 1                               | 1                        | 1                    | 2                               | 5     |
|                   | <i>Bacillus circulans</i>             | 2                               |                          |                      |                                 | 2     |
|                   | <i>Bacillus clausii</i>               | 1                               |                          |                      | 1                               | 2     |
|                   | <i>Bacillus coagulans</i>             |                                 |                          | 1                    |                                 | 1     |
|                   | <i>Bacillus fastidiosus</i>           | 1                               |                          |                      |                                 | 1     |
|                   | <i>Bacillus firmus</i>                | 1                               |                          |                      |                                 | 1     |
| Bacillaceae       | <i>Bacillus laterosporus</i>          | 1                               |                          |                      |                                 | 1     |
|                   | <i>Bacillus licheniformis</i>         | 7                               |                          | 3                    | 5                               | 15    |
|                   | <i>Bacillus macerans</i>              |                                 |                          | 1                    |                                 | 1     |
|                   | <i>Bacillus megaterium</i>            | 12                              |                          | 1                    | 1                               | 14    |
|                   | <i>Bacillus pantothenicus</i>         | 1                               |                          |                      |                                 | 1     |
|                   | <i>Bacillus pasteurii</i>             | 1                               |                          |                      | 1                               | 2     |
|                   | <i>Bacillus pumilis</i>               | 2                               |                          | 2                    | 1                               | 5     |
|                   | <i>Bacillus simplex</i>               |                                 |                          |                      | 2                               | 2     |
|                   | <i>Bacillus sphaericus</i>            | 2                               |                          |                      |                                 | 2     |
|                   | <i>Bacillus spp</i>                   | 2                               |                          |                      |                                 | 2     |
| Enterococcaceae   | <i>Bacillus subtilis</i>              | 4                               |                          | 3                    | 1                               | 8     |
|                   | <i>Enterococcus casseliflavus</i>     |                                 | 1                        | 2                    |                                 | 3     |
| Lactobacillaceae  | <i>Enterococcus faecalis</i>          | 14                              | 2                        | 7                    | 5                               | 28    |
|                   | <i>Alloicoccus otitis</i>             |                                 |                          |                      | 1                               | 1     |
| Paenibacillaceae  | <i>Paenibacillus durus</i>            | 1                               |                          |                      |                                 | 1     |
| Staphylococcaceae | <i>Staphylococcus aureus</i>          |                                 |                          | 1                    |                                 | 1     |
|                   | <i>Staphylococcus capitis</i>         | 1                               |                          |                      | 2                               | 3     |
|                   | <i>Staphylococcus cohnii</i> subsp. 1 | 1                               |                          | 2                    | 1                               | 4     |

|                                       |       |      |       |       |         |
|---------------------------------------|-------|------|-------|-------|---------|
| <i>Staphylococcus cohnii</i> subsp. 2 | 1     |      | 4     |       | 5       |
| <i>Staphylococcus epidermidis</i>     | 4     | 1    | 1     | 3     | 9       |
| <i>Staphylococcus gallinarum</i>      | 1     |      | 1     |       | 2       |
| <i>Staphylococcus haemolyticus</i>    | 3     |      |       | 1     | 4       |
| <i>Staphylococcus hominis</i>         |       | 1    |       |       | 1       |
| <i>Staphylococcus koosi</i>           | 3     |      |       |       | 3       |
| <i>Staphylococcus lentus</i>          | 2     |      | 3     | 2     | 7       |
| <i>Staphylococcus saprophyticus</i>   | 2     |      | 1     |       | 3       |
| <i>Staphylococcus sciuri</i>          | 3     |      | 7     | 2     | 12      |
| <i>Staphylococcus simulans</i>        | 2     |      |       |       | 2       |
| <i>Staphylococcus warneri</i>         | 8     | 1    |       | 1     | 10      |
| <i>Staphylococcus xylosus</i>         | 5     | 1    |       | 1     | 7       |
| Not id.                               | 1     | 1    |       |       | 2       |
| Total                                 | 95/91 | 10/8 | 44/47 | 34/43 | 183/189 |

Supplementary Table S5: List of antibiotics used in Gram negative antimicrobial susceptibility tests and relative inhibition halos diameters for resistant (R), intermediate (I) and sensitive (S) strains.

| Class            | Antibiotics                 | Code µg | Diameter (mm) |       |     |
|------------------|-----------------------------|---------|---------------|-------|-----|
|                  |                             |         | R <           | I     | S > |
| Aminoglycosides  | gentamicin                  | CN 10   | 13            | 14-15 | 16  |
|                  | streptomycin                | S 10    | 11            | 12-14 | 15  |
|                  | tobramycin                  | TOB 10  | 13            | 14-15 | 16  |
| Carbapenems      | imipenem                    | IMI 10  | 19            | 20-22 | 23  |
|                  | meropenem                   | MRP 10  | 19            | 20-22 | 23  |
| Cephalosporins   | cefotaxime                  | CTX 30  | 22            | 23-25 | 26  |
|                  | cefotaxime+clavulanic acid  | CTL 40  | 22            | 23-25 | 26  |
|                  | ceftazidime                 | CAZ 30  | 17            | 18-20 | 21  |
| Chloramphenicol  | chloramphenicol             | C 30    | 12            | 13-17 | 18  |
| Fluoroquinolones | ciprofloxacin               | CIP 5   | 19            | 20-21 | 22  |
|                  | enrofloxacin                | ENR 5   | 15            | 16-20 | 21  |
| Monobactams      | aztreonam                   | ATM 30  | 17            | 18-20 | 21  |
| Penicillins      | amoxicillin                 | AML 30  | 13            | 14-17 | 18  |
|                  | amoxicillin+clavulanic acid | AUG 30  | 13            | 14-17 | 18  |
|                  | ampicillin                  | AMP 10  | 13            | 14-16 | 17  |
| Polymyxins       | colistin sulfate            | CS 10   | 11            | 12-16 | 17  |
| Quinolones       | nalidixic acid              | NA 30   | 13            | 14-18 | 19  |
| Sulfonamides     | co-trimoxazole              | SXT 25  | 13            | 14-15 | 16  |
| Tetracyclines    | minocycline                 | MN 30   | 12            | 13-15 | 16  |
|                  | tetracycline                | TE 30   | 11            | 12-14 | 15  |

Supplementary Table S6: List of antibiotics used in Gram positive antimicrobial susceptibility tests and relative inhibition halos diameters for resistant (R), intermediate (I) and sensitive (S) strains.

| Class           | Antibiotics | Code µg | Diameter (mm) |       |     |
|-----------------|-------------|---------|---------------|-------|-----|
|                 |             |         | R <           | I     | S > |
| Aminoglycosides | gentamicin  | CN 10   | 12            | 13-14 | 15  |
|                 | tobramycin  | TOB 10  | 12            | 13-14 | 15  |
| Carbapenems     | imipenem    | IMI 10  | 16            | 17-21 | 22  |

|                  |                                                                       |        |          |       |          |
|------------------|-----------------------------------------------------------------------|--------|----------|-------|----------|
|                  | meropenem                                                             | MRP 10 | 16       | 17-21 | 22       |
| Cephalosporins   | ceftazidime                                                           | CAZ 30 | 14       | 15-17 | 18       |
|                  | cefovecin                                                             | CVN 10 | 14       | 15-20 | 21       |
|                  | cefepime                                                              | FEP 30 | 14       | 15-17 | 18       |
|                  | ceftaroline                                                           | CPT 30 | 23       |       | 23       |
| Fluoroquinolones | enrofloxacin                                                          | ENR 5  | 17       | 18-20 | 21       |
| Glycopeptides    | vancomycin                                                            | VA 30  | 14       | 15-16 | 17       |
| Lincosamides     | lincomycin                                                            | MY 15  | 14       | 15-20 | 21       |
| Macrolides       | erythromycin                                                          | E 15   | 13       | 14-22 | 23       |
| Penicillins      | amoxicillin                                                           | AML 30 | 13       | 14-16 | 17       |
|                  | amoxicillin+clavulanic acid                                           | AUG 30 | 19       |       | 20       |
|                  | ampicillin                                                            | AMP 10 | 13       | 14-16 | 17       |
|                  | <i>Staphylococcus</i> spp.                                            |        | 28       |       | 29       |
|                  | ampicillin+sulbactam                                                  | AMS 20 | 11       | 12-14 | 15       |
|                  | oxacillin                                                             | OX 1   | 10       | 11-12 | 13       |
|                  | <i>Staphylococcus</i> spp. coagulase -<br>ticarcillin+clavulanic acid | TIM 85 | 18<br>22 |       | 19<br>23 |
| Tetracyclines    | minocycline                                                           | MN 30  | 14       | 15-18 | 19       |
|                  | tetracycline                                                          | TE 30  | 11       | 12-14 | 15       |

Supplementary Table S7: MDR pattern in Gram-negative strains.

| N. Classes | Antimicrobial Classes                  | Bacterial Genera and n. strains ()                                                          | Total strains |
|------------|----------------------------------------|---------------------------------------------------------------------------------------------|---------------|
| 8          | AMI; CEP; QUI; PEN; SUL; TET; PHE; POL | <i>Pseudomonas</i> (2)                                                                      | 2             |
|            | AMI; CAR; QUI; PEN; SUL; TET; PHE; POL | <i>Pseudomonas</i> (1)                                                                      | 1             |
|            | AMI; CEP; CAR; QUI; MON; PEN; SUL; POL | <i>Klebsiella</i> (1)                                                                       | 1             |
|            | AMI; CEP; CAR; QUI; MON; PEN; TET; POL | <i>Citrobacter</i> (1)                                                                      | 1             |
| 7          | AMI; CEP; CAR; QUI; PEN; TET; POL      | <i>Citrobacter</i> (3), <i>Enterobacter</i> (2)                                             | 5             |
|            | AMI; QUI; PEN; SUL; TET; PHE; POL      | <i>Pseudomonas</i> (3)                                                                      | 3             |
|            | AMI; CEP; QUI; PEN; SUL; TET; POL      | <i>Achromobacter</i> (1)                                                                    | 1             |
|            | AMI; CEP; CAR; QUI; MON; TET; POL      | <i>Enterobacter</i> (1)                                                                     | 1             |
|            | AMI; CEP; MON; PEN; SUL; PHE; POL      | <i>Enterobacter</i> (1)                                                                     | 1             |
|            | AMI; CEP; CAR; PEN; SUL; TET; POL      | <i>Enterobacter</i> (1)                                                                     | 1             |
|            | AMI; CEP; QUI; PEN; SUL; TET; POL      | <i>Pseudomonas</i> (1)                                                                      | 1             |
|            | AMI; CEP; CAR; MON; PEN; TET; POL      | <i>Citrobacter</i> (1)                                                                      | 1             |
| 6          | AMI; CEP; CAR; PEN; TET; POL           | <i>Citrobacter</i> (3), <i>Enterobacter</i> (6), <i>Proteus</i> (1),<br><i>Serratia</i> (2) | 12            |
|            | AMI; CEP; CAR; QUI; MON; POL           | <i>Enterobacter</i> (2), <i>Hafnia</i> (2), <i>Providencia</i> (2),<br><i>Serratia</i> (2)  | 8             |
|            | AMI; CEP; MON; PEN; PHE; POL           | <i>Achromobacter</i> (1)                                                                    | 1             |
|            | AMI; QUI; PEN; TET; PHE; POL           | <i>Pseudomonas</i> (1)                                                                      | 1             |
|            | CEP; CAR; MON; PEN; PHE; POL           | <i>Pseudomonas</i> (1)                                                                      | 1             |
| 5          | AMI; CAR; PEN; TET; POL                | <i>Citrobacter</i> (1), <i>Enterobacter</i> (7), <i>Morganella</i> (1)                      | 9             |
|            | AMI; CEP; PEN; TET; POL                | <i>Enterobacter</i> (3), <i>Proteus</i> (1)                                                 | 4             |
|            | AMI; CEP; QUI; MON; POL                | <i>Enterobacter</i> (1), <i>Providencia</i> (1), <i>Serratia</i> (2)                        | 4             |
|            | AMI; QUI; PEN; TET; POL                | <i>Citrobacter</i> (1), <i>Pseudomonas</i> (3)                                              | 4             |
|            | AMI; QUI; MON; PEN; POL                | <i>Kluyvera</i> (1)                                                                         | 1             |
|            | AMI; CAR; QUI; PEN; POL                | <i>Moellerella</i> (1)                                                                      | 1             |

|   |                         |                                                                                                                                                                                                                           |    |
|---|-------------------------|---------------------------------------------------------------------------------------------------------------------------------------------------------------------------------------------------------------------------|----|
|   | AMI; CEP; CAR; PEN; POL | <i>Enterobacter</i> (1)                                                                                                                                                                                                   | 1  |
| 4 | AMI; PEN; TET; POL      | <i>Citrobacter</i> (1), <i>Enterobacter</i> (10), <i>Hafnia</i> (1), <i>Providencia</i> (1), <i>Pseudomonas</i> (1), <i>Serratia</i> (3)                                                                                  | 17 |
|   | AMI; CEP; PEN; POL      | <i>Alcaligenes</i> (2), <i>Citrobacter</i> (1), <i>Enterobacter</i> (1)                                                                                                                                                   | 4  |
|   | AMI; CAR; PEN; POL      | <i>Citrobacter</i> (2)                                                                                                                                                                                                    | 2  |
|   | AMI; MON; PEN; POL      | <i>Citrobacter</i> (1)                                                                                                                                                                                                    | 1  |
|   | QUI; MON; PEN; POL      | <i>Enterobacter</i> (1)                                                                                                                                                                                                   | 1  |
|   | CEP; MON; PEN; POL      | <i>Enterobacter</i> (1)                                                                                                                                                                                                   | 1  |
|   | CEP; QUI; MON; POL      | <i>Klebsiella</i> (1)                                                                                                                                                                                                     | 1  |
|   | CAR; PEN; TET; POL      | <i>Morganella</i> (1)                                                                                                                                                                                                     | 1  |
| 3 | AMI; PEN; POL           | <i>Citrobacter</i> (5), <i>Enterobacter</i> (31), <i>Escherichia</i> (1), <i>Hafnia</i> (2), <i>Klebsiella</i> (2), <i>Morganella</i> (2), <i>NI</i> (1), <i>Proteus</i> (1), <i>Pseudomonas</i> (2), <i>Serratia</i> (3) | 50 |
|   | PEN; TET; POL           | <i>Enterobacter</i> (3), <i>Klebsiella</i> (2), <i>Moellerella</i> (1), <i>Morganella</i> (4), <i>Proteus</i> (1), <i>Providencia</i> (10), <i>Serratia</i> (3)                                                           | 24 |
|   | QUI; MON; POL           | <i>Enterobacter</i> (1)                                                                                                                                                                                                   | 1  |
|   | AMI; TET; POL           | <i>Serratia</i> (1)                                                                                                                                                                                                       | 1  |

Legenda: AMI= Aminoglycosides; CEP= cephalosporin; CAR= carbapenemes; QUI= quinolones; MON= monobactams; PEN= penicillins; SUL= sulfonamides; TET= tetracyclines; PHE= phenicols; POL= polymyxins

Supplementary Table S8: MDR pattern in Gram-positive strains.

| N. Classes | Antimicrobial Classes                       | Bacterial Genera and n. strains ()                 | Total strains |
|------------|---------------------------------------------|----------------------------------------------------|---------------|
| 9          | AMI, CEP, CAR, FLU, GLY, LIN, MAC, PEN, TET | <i>Enterococcus</i> (1)                            | 1             |
| 8          | AMI, CEP, CAR, GLY, LIN, MAC, PEN, TET      | <i>Enterococcus</i> (1); <i>Staphylococcus</i> (1) | 2             |
|            | AMI, CEP, CAR, FLU, GLY, LIN, MAC, PEN      | <i>Enterococcus</i> (4)                            | 4             |
|            | AMI, CEP, CAR, FLU, LIN, MAC, PEN, TET      | <i>Staphylococcus</i> (1)                          | 1             |
| 7          | AMI, CEP, CAR, GLY, LIN, MAC, PEN           | <i>Bacillus</i> (1)                                | 1             |
|            | CEP, CAR, GLY, LIN, MAC, PEN, TET           | <i>Bacillus</i> (1)                                | 1             |
|            | AMI, CEP, GLY, LIN, MAC, PEN, TET           | <i>Bacillus</i> (1)                                | 1             |
|            | AMI, CEP, FLU, LIN, MAC, PEN, TET           | <i>Enterococcus</i> (1)                            | 1             |
|            | AMI, CEP, CAR, FLU, LIN, MAC, PEN           | <i>Enterococcus</i> (1)                            | 1             |
|            | AMI, CEP, CAR, FLU, GLY, LIN, PEN           | <i>Staphylococcus</i> (1)                          | 1             |
|            | AMI, CEP, CAR, GLY, MAC, PEN                | <i>Bacillus</i> (1)                                | 1             |
| 6          | AMI, CEP, CAR, LIN, MAC, PEN                | <i>Bacillus</i> (1); <i>Enterococcus</i> (7)       | 8             |
|            | AMI, CEP, GLY, LIN, MAC, PEN                | <i>Staphylococcus</i> (1)                          | 1             |
|            | CEP, CAR, GLY, LIN, MAC, PEN                | <i>Staphylococcus</i> (1)                          | 1             |
|            | CEP, GLY, LIN, MAC, PEN                     | <i>Bacillus</i> (1); <i>Staphylococcus</i> (1)     | 2             |
| 5          | AMI, CEP, GLY, MAC, PEN                     | <i>Bacillus</i> (1); <i>Staphylococcus</i> (2)     | 3             |
|            | AMI, CEP, LIN, MAC, PEN                     | <i>Bacillus</i> (1); <i>Staphylococcus</i> (1)     | 2             |
|            | AMI, CEP, CAR, MAC, PEN                     | <i>Enterococcus</i> (2)                            | 2             |
|            | AMI, CEP, CAR, LIN, PEN                     | <i>Enterococcus</i> (3); <i>Staphylococcus</i> (4) | 7             |
|            | CEP, CAR, GLY, LIN, PEN                     | <i>Staphylococcus</i> (1)                          | 1             |
|            | AMI, CEP, CAR, GLY, PEN                     | <i>Staphylococcus</i> (1)                          | 1             |
|            |                                             |                                                    |               |
|            |                                             |                                                    |               |

|   |                         |                                                                                                   |    |
|---|-------------------------|---------------------------------------------------------------------------------------------------|----|
|   | CEP, GLY, LIN, PEN, TET | <i>Staphylococcus</i> (1)                                                                         | 1  |
|   | AMI, CEP, GLY, LIN, PEN | <i>Staphylococcus</i> (1)                                                                         | 1  |
|   | AMI, CEP, FLU, GLY, MAC | <i>Staphylococcus</i> (1)                                                                         | 1  |
| 4 | CEP, LIN, MAC, PEN      | <i>Bacillus</i> (2)                                                                               | 2  |
|   | CEP, GLY, MAC, PEN      | <i>Bacillus</i> (1)                                                                               | 1  |
|   | GLY, LIN, MAC, PEN      | <i>Bacillus</i> (1); <i>Enterococcus</i> (1);<br><i>Staphylococcus</i> (1)                        | 3  |
|   | AMI, CEP, LIN, PEN      | <i>Bacillus</i> (4); <i>Staphylococcus</i> (4)                                                    | 8  |
|   | AMI, CEP, MAC, PEN      | <i>Bacillus</i> (1)                                                                               | 1  |
|   | AMI, CEP, CAR, PEN      | <i>Enterococcus</i> (2); <i>Staphylococcus</i> (2)                                                | 4  |
|   | CEP, LIN, MAC, TET      | <i>Staphylococcus</i> (1)                                                                         | 1  |
|   | CEP, FLU, PEN, TET      | <i>Staphylococcus</i> (2)                                                                         | 2  |
|   | CEP, GLY, LIN, PEN      | <i>Staphylococcus</i> (1)                                                                         | 1  |
|   | AMI, CEP, CAR, PEN      | <i>Staphylococcus</i> (1)                                                                         | 1  |
|   | AMI, CEP, GLY, PEN      | <i>Staphylococcus</i> (2)                                                                         | 2  |
| 3 | AMI, CEP, PEN           | <i>Aerococcus</i> (2); <i>Bacillus</i> (5);<br><i>Enterococcus</i> (2); <i>Staphylococcus</i> (5) | 14 |
|   | CEP, GLY, PEN           | <i>Bacillus</i> (1); <i>Staphylococcus</i> (3)                                                    | 4  |
|   | CEP, LIN, PEN           | <i>Bacillus</i> (2); <i>Staphylococcus</i> (2)                                                    | 4  |
|   | CEP, MAC, PEN           | <i>Bacillus</i> (1); NI (1);                                                                      | 2  |
|   | LIN, MAC, PEN           | <i>Staphylococcus</i> (1)                                                                         | 1  |
|   | CEP, GLY, MAC           | <i>Staphylococcus</i> (1)                                                                         | 1  |
